# Supplementary material for: A Data-Driven Medical Decision Framework for Associating Adverse Drug Events with Drug-Drug Interaction Mechanisms
Source: Hindawi journal article supplement (doi:10.1155/2022/9132477), 2022-03-03
Supplement: f1 [file 9132477.f1.docx]

**Supplementary (1):** **The top 20 overrepresented HPO terms for each drug-drug interaction mechanism.**

| Side effects similarity, overrepresentation = 0.003 | | |
| --- | --- | --- |
| ADE | HPO | Lowest overrepresentation p-value |
| Abnormality of higher mental function | HP:0011446 | 5.30E-15 |
| Neurological speech impairment | HP:0002167 | 4.04E-14 |
| Abnormality of the voice | HP:0001608 | 2.84E-12 |
| Dysphonia | HP:0001618 | 2.84E-12 |
| Abnormality of nervous system physiology | HP:0012638 | 8.70E-11 |
| Abnormality of carbohydrate metabolism/homeostasis | HP:0011013 | 2.99E-06 |
| Abnormal glucose homeostasis | HP:0011014 | 2.99E-06 |
| Abnormality of blood glucose concentration | HP:0011015 | 1.41E-05 |
| Growth abnormality | HP:0001507 | 2.94E-05 |
| Abnormality of body weight | HP:0004323 | 2.94E-05 |
| Hypoglycemia | HP:0001943 | 4.77E-05 |
| Abnormal emotion/affect behavior | HP:0100851 | 5.75E-05 |
| Restlessness | HP:0000711 | 7.55E-05 |
| Decreased body weight | HP:0004325 | 0.000100246 |
| Weight loss | HP:0001824 | 0.000111726 |
| Sleep disturbance | HP:0002360 | 0.000174409 |
| Venous abnormality | HP:0002624 | 0.00019888 |
| Abnormal thrombosis | HP:0001977 | 0.000216337 |
| Thrombophlebitis | HP:0004418 | 0.000216337 |
| Venous thrombosis | HP:0004936 | 0.000216337 |

| Competitive pharmacological, overrepresentation = 0.003 | | |
| --- | --- | --- |
| ADE | HPO annotation | Lowest overrepresentation p-value |
| Increased body weight | HP:0004324 | 1.19E-09 |
| Pancreatitis | HP:0001733 | 4.13E-07 |
| Abnormality of pancreas physiology | HP:0012091 | 4.13E-07 |
| Abnormality of the pancreas | HP:0001732 | 6.33E-07 |
| Behavioral abnormality | HP:0000708 | 1.68E-06 |
| Abnormality of nervous system physiology | HP:0012638 | 9.10E-06 |
| Ketosis | HP:0001946 | 2.41E-05 |
| Ketoacidosis | HP:0001993 | 2.41E-05 |
| Growth abnormality | HP:0001507 | 3.44E-05 |
| Abnormality of body weight | HP:0004323 | 3.44E-05 |
| Diabetic ketoacidosis | HP:0001953 | 0.000227617 |
| Abnormal emotion/affect behavior | HP:0100851 | 0.000253915 |
| Diabetes mellitus | HP:0000819 | 0.000280852 |
| Abnormality of the nervous system | HP:0000707 | 0.000336487 |
| Excessive daytime somnolence | HP:0001262 | 0.000532295 |
| Reduced consciousness/confusion | HP:0004372 | 0.000532295 |
| Restlessness | HP:0000711 | 0.000866685 |
| Sleep disturbance | HP:0002360 | 0.00201341 |
| Psychosis | HP:0000709 | 0.00297815 |
| Abnormal inflammatory response | HP:0012647 | 0.00371157 |

| Indication similarity, overrepresentation = 0 | | |
| --- | --- | --- |
| ADE | HPO | Lowest overrepresentation p-value |
| Abnormality of leukocytes | HP:0001881 | 3.67E-11 |
| Abnormal leukocyte count | HP:0011893 | 2.32E-10 |
| Abnormality of bone marrow cell morphology | HP:0005561 | 2.42E-07 |
| Abnormality of the voice | HP:0001608 | 5.44E-07 |
| Dysphonia | HP:0001618 | 5.44E-07 |
| Abnormality of erythrocytes | HP:0001877 | 8.76E-07 |
| Abnormality of cells of the erythroid lineage | HP:0012130 | 8.76E-07 |
| Abnormality of the urinary system physiology | HP:0011277 | 8.88E-07 |
| Pancytopenia | HP:0001876 | 2.82E-06 |
| Abnormality of multiple cell lineages in the bone marrow | HP:0012145 | 2.82E-06 |
| Abnormality of higher mental function | HP:0011446 | 4.09E-06 |
| Thrombocytopenia | HP:0001873 | 6.13E-06 |
| Neurological speech impairment | HP:0002167 | 6.72E-06 |
| Phenotypic abnormality | HP:0000118 | 1.01E-05 |
| Abnormality of blood and blood-forming tissues | HP:0001871 | 1.03E-05 |
| Leukopenia | HP:0001882 | 1.16E-05 |
| Abnormal renal physiology | HP:0012211 | 1.35E-05 |
| Acute kidney injury | HP:0001919 | 1.90E-05 |
| Renal insufficiency | HP:0000083 | 2.48E-05 |
| Abnormality of neutrophils | HP:0001874 | 3.23E-05 |

| Multi pathways, overrepresentation = 0.003 | | |
| --- | --- | --- |
| ADE | HPO | Lowest overrepresentation p-value |
| Phenotypic abnormality | HP:0000118 | 5.09E-05 |
| Abnormal leukocyte count | HP:0011893 | 8.98E-05 |
| Abnormality of leukocytes | HP:0001881 | 9.74E-05 |
| Abnormality of cellular immune system | HP:0010987 | 9.74E-05 |
| Abnormality of the voice | HP:0001608 | 9.89E-05 |
| Dysphonia | HP:0001618 | 9.89E-05 |
| Pancytopenia | HP:0001876 | 0.000103805 |
| Abnormality of multiple cell lineages in the bone marrow | HP:0012145 | 0.000103805 |
| Abnormality of erythrocytes | HP:0001877 | 0.000118412 |
| Abnormality of cells of the erythroid lineage | HP:0012130 | 0.000118412 |
| Neurological speech impairment | HP:0002167 | 0.000180721 |
| Thrombocytopenia | HP:0001873 | 0.000211351 |
| Abnormality of bone marrow cell morphology | HP:0005561 | 0.000231992 |
| Abnormality of higher mental function | HP:0011446 | 0.000284275 |
| Abnormality of the vasculature | HP:0002597 | 0.000979255 |
| Pancreatitis | HP:0001733 | 0.00414148 |
| Abnormality of pancreas physiology | HP:0012091 | 0.00414148 |
| Abnormality of the pancreas | HP:0001732 | 0.00638608 |
| Abnormality of blood and blood-forming tissues | HP:0001871 | 0.00791093 |
| Abnormality of thrombocytes | HP:0001872 | 0.0128511 |

| Additive pharmacodynamic, overrepresentation = 0 | | |
| --- | --- | --- |
| ADE | HPO | Lowest overrepresentation p-value |
| Abnormality of leukocytes | HP:0001881 | 6.81E-09 |
| Abnormality of cellular immune system | HP:0010987 | 6.81E-09 |
| Abnormal leukocyte count | HP:0011893 | 3.90E-08 |
| Abnormality of bone marrow cell morphology | HP:0005561 | 2.46E-07 |
| Abnormality of the immune system | HP:0002715 | 5.26E-07 |
| Pancytopenia | HP:0001876 | 6.00E-07 |
| Abnormality of multiple cell lineages in the bone marrow | HP:0012145 | 6.00E-07 |
| Thrombocytopenia | HP:0001873 | 1.06E-06 |
| Abnormality of erythrocytes | HP:0001877 | 2.28E-06 |
| Abnormality of cells of the erythroid lineage | HP:0012130 | 2.28E-06 |
| Abnormality of prenatal development or birth | HP:0001197 | 8.84E-05 |
| Abnormality of blood and blood-forming tissues | HP:0001871 | 0.000227436 |
| Seizures | HP:0001250 | 0.000280474 |
| Increased body weight | HP:0004324 | 0.000614712 |
| Hepatomegaly | HP:0002240 | 0.000799856 |
| Abnormality of thrombocytes | HP:0001872 | 0.00113398 |
| Abnormal platelet count | HP:0011873 | 0.00113398 |
| Skin rash | HP:0000988 | 0.0016008 |
| Diabetes mellitus | HP:0000819 | 0.00214694 |
| Abnormal delivery | HP:0001787 | 0.00235442 |

| Metabolism inducer, overrepresentation = 0.01 | | |
| --- | --- | --- |
| ADE | HPO | Lowest overrepresentation p-value |
| Seizures | HP:0001250 | 2.76E-16 |
| Abnormal inflammatory response | HP:0012647 | 3.41E-05 |
| Increased inflammatory response | HP:0012649 | 3.41E-05 |
| Multiple myeloma | HP:0006775 | 9.59E-05 |
| Growth abnormality | HP:0001507 | 0.000100682 |
| Abnormality of body weight | HP:0004323 | 0.000100682 |
| Metrorrhagia | HP:0100608 | 0.000142206 |
| Menstrual irregularities | HP:0000858 | 0.000193436 |
| Puberty and gonadal disorders | HP:0008373 | 0.000193436 |
| Pancreatitis | HP:0001733 | 0.000280236 |
| Abnormality of pancreas physiology | HP:0012091 | 0.000280236 |
| Weight loss | HP:0001824 | 0.000512676 |
| Abnormality of the pancreas | HP:0001732 | 0.000543188 |
| Decreased body weight | HP:0004325 | 0.000554616 |
| Arthritis | HP:0001369 | 0.000747145 |
| Rheumatoid arthritis | HP:0001370 | 0.000747145 |
| Abnormality of female internal genitalia | HP:0000008 | 0.00107366 |
| Abnormality of the menstrual cycle | HP:0000140 | 0.00107366 |
| Abnormality of the female genitalia | HP:0010460 | 0.00107366 |
| Hematological neoplasm | HP:0004377 | 0.0011469 |

| Metabolism inhibitor, overrepresentation = 0 | | |
| --- | --- | --- |
| ADE | HPO | Lowest overrepresentation p-value |
| Growth abnormality | HP:0001507 | 1.16E-14 |
| Abnormality of body weight | HP:0004323 | 1.16E-14 |
| Weight loss | HP:0001824 | 1.67E-10 |
| Decreased body weight | HP:0004325 | 2.18E-10 |
| Arthritis | HP:0001369 | 2.80E-08 |
| Rheumatoid arthritis | HP:0001370 | 2.80E-08 |
| Abnormality of nervous system physiology | HP:0012638 | 9.51E-08 |
| Abnormality of the nervous system | HP:0000707 | 1.86E-07 |
| Phenotypic abnormality | HP:0000118 | 7.20E-07 |
| Pancreatitis | HP:0001733 | 1.52E-06 |
| Abnormality of pancreas physiology | HP:0012091 | 1.52E-06 |
| Abnormality of higher mental function | HP:0011446 | 4.00E-06 |
| Abnormality of skeletal morphology | HP:0011842 | 4.57E-06 |
| Abnormal joint morphology | HP:0001367 | 5.10E-06 |
| Abnormality of the pancreas | HP:0001732 | 7.31E-06 |
| Increased body weight | HP:0004324 | 1.03E-05 |
| Abnormality of the voice | HP:0001608 | 1.78E-05 |
| Dysphonia | HP:0001618 | 1.78E-05 |
| Neurological speech impairment | HP:0002167 | 2.42E-05 |
| Ketosis | HP:0001946 | 8.81E-05 |

| Protien binding,overrepresentation = 0.02 | | |
| --- | --- | --- |
| ADE | HPO | Lowest overrepresentation p-value |
| Abnormality of the voice | HP:0001608 | 1.72E-09 |
| Dysphonia | HP:0001618 | 1.72E-09 |
| Growth abnormality | HP:0001507 | 1.22E-08 |
| Abnormality of body weight | HP:0004323 | 1.22E-08 |
| Neurological speech impairment | HP:0002167 | 1.65E-08 |
| Abnormality of higher mental function | HP:0011446 | 3.38E-08 |
| Weight loss | HP:0001824 | 2.48E-07 |
| Decreased body weight | HP:0004325 | 2.94E-07 |
| Abnormality of nervous system physiology | HP:0012638 | 4.70E-06 |
| Abnormality of the nervous system | HP:0000707 | 2.08E-05 |
| Restlessness | HP:0000711 | 0.00024715 |
| Abnormal emotion/affect behavior | HP:0100851 | 0.000334645 |
| Diabetes mellitus | HP:0000819 | 0.00141837 |
| Superficial thrombophlebitis | HP:0002638 | 0.00143085 |
| Abnormal thrombosis | HP:0001977 | 0.00154888 |
| Thrombophlebitis | HP:0004418 | 0.00154888 |
| Venous thrombosis | HP:0004936 | 0.00154888 |
| Abnormality of the musculature | HP:0003011 | 0.00159481 |
| Venous abnormality | HP:0002624 | 0.00167553 |
| Pancreatitis | HP:0001733 | 0.00287748 |

| Transporter inhibitor, overrepresentation = 0 | | |
| --- | --- | --- |
| ADE | HPO | Lowest overrepresentation p-value |
| Pancytopenia | HP:0001876 | 9.46E-11 |
| Abnormality of multiple cell lineages in the bone marrow | HP:0012145 | 9.46E-11 |
| Thrombocytopenia | HP:0001873 | 4.76E-10 |
| Abnormality of erythrocytes | HP:0001877 | 5.33E-10 |
| Abnormality of cells of the erythroid lineage | HP:0012130 | 5.33E-10 |
| Abnormal leukocyte count | HP:0011893 | 1.43E-09 |
| Abnormality of bone marrow cell morphology | HP:0005561 | 2.29E-09 |
| Abnormality of leukocytes | HP:0001881 | 2.58E-09 |
| Abnormality of cellular immune system | HP:0010987 | 2.58E-09 |
| Phenotypic abnormality | HP:0000118 | 4.01E-08 |
| Abnormality of thrombocytes | HP:0001872 | 5.82E-06 |
| Abnormal platelet count | HP:0011873 | 5.82E-06 |
| Abnormality of the cardiovascular system | HP:0001626 | 9.15E-06 |
| Abnormality of the immune system | HP:0002715 | 2.27E-05 |
| Abnormality of blood and blood-forming tissues | HP:0001871 | 3.60E-05 |
| Abnormality of the vasculature | HP:0002597 | 0.000110536 |
| Abnormality of the systemic arterial tree | HP:0011004 | 0.000118359 |
| Arteriosclerosis | HP:0002634 | 0.000121437 |
| Abnormalities of the peripheral arteries | HP:0005114 | 0.000139914 |
| Arterial stenosis | HP:0100545 | 0.000139914 |

| Transporter inducer, overrepresentation = 0 | | |
| --- | --- | --- |
| ADE | HPO | Lowest overrepresentation p-value |
| Abnormality of blood and blood-forming tissues | HP:0001871 | 1.41E-10 |
| Abnormality of the immune system | HP:0002715 | 2.05E-09 |
| Abnormality of leukocytes | HP:0001881 | 1.78E-08 |
| Abnormality of cellular immune system | HP:0010987 | 1.78E-08 |
| Abnormal leukocyte count | HP:0011893 | 2.68E-08 |
| Pancytopenia | HP:0001876 | 8.09E-07 |
| Abnormality of multiple cell lineages in the bone marrow | HP:0012145 | 8.09E-07 |
| Abnormality of erythrocytes | HP:0001877 | 1.02E-06 |
| Abnormality of cells of the erythroid lineage | HP:0012130 | 1.02E-06 |
| Thrombocytopenia | HP:0001873 | 1.52E-06 |
| Abnormality of bone marrow cell morphology | HP:0005561 | 1.84E-06 |
| Lymphadenopathy | HP:0002716 | 6.68E-06 |
| Abnormality of the lymph nodes | HP:0002733 | 6.68E-06 |
| Abnormality of the lymphatic system | HP:0100763 | 1.29E-05 |
| Superficial thrombophlebitis | HP:0002638 | 2.47E-05 |
| Abnormal thrombosis | HP:0001977 | 2.58E-05 |
| Thrombophlebitis | HP:0004418 | 2.58E-05 |
| Venous thrombosis | HP:0004936 | 2.58E-05 |
| Venous abnormality | HP:0002624 | 2.68E-05 |
| Abnormality of thrombocytes | HP:0001872 | 4.44E-05 |
